# Supplementary material for: Improved charge extraction through interface engineering for 10.12% efficiency and stable CsPbBr3 perovskite solar cells
Source: Royal Society of Chemistry journal article supplement (doi:10.1039/d0ta08675d), 2020-01-01
Supplement: d0ta08675d1.pdf [file d0ta08675d1.pdf]

## Supporting Information

### Improved Charge Extraction through Interface Engineering for 10.12%-efficiency and Stable CsPbBr<sub>3</sub> Perovskite Solar Cells

Jingwei Zhu,<sup>a</sup> Mixue Tang,<sup>a</sup> Benlin He,<sup>\*a</sup> Wenyu Zhang,<sup>a</sup> Xueke Li,<sup>a</sup> Zekun Gong,<sup>a</sup>

Haiyan Chen,<sup>a</sup> Yanyan Duan<sup>c</sup> and Qunwei Tang<sup>\*b</sup>

<sup>a</sup> *School of Materials Science and Engineering, Ocean University of China, 238*

*Songling Road, Qingdao 266100, P.R. China*

<sup>b</sup> *College of Information Science and Technology, Jinan University, 601 Huangpu*

*Avenue West, Guangzhou 510632, P.R. China*

<sup>c</sup> *State Centre for International Cooperation on Designer Low-Carbon and*

*Environmental Material (SCICDLCEM), School of Materials Science and*

*Engineering, Zhengzhou University, Zhengzhou 450001, P.R. China*

**\* Corresponding Authors.** E-mail: blhe@ouc.edu.cn, tangqunwei@jnu.edu.cn

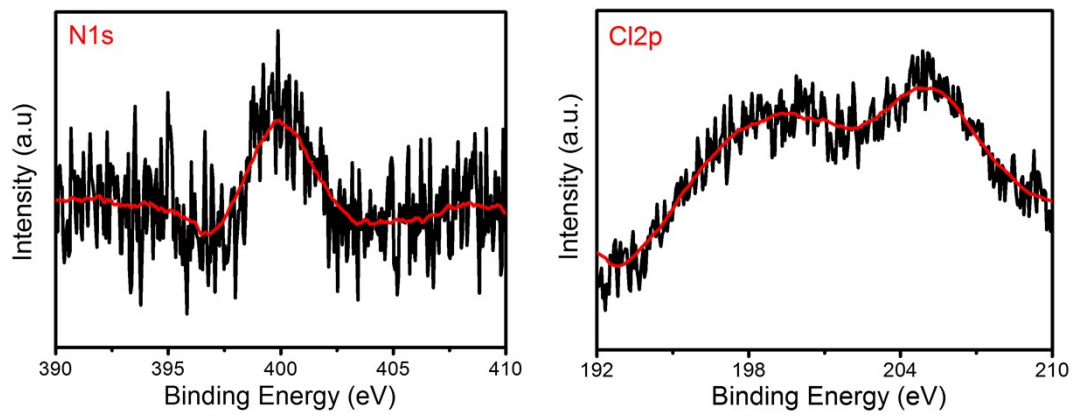

**Fig. S1.** N1s and Cl2p XPS spectra of TiO<sub>2</sub>/AC sample.

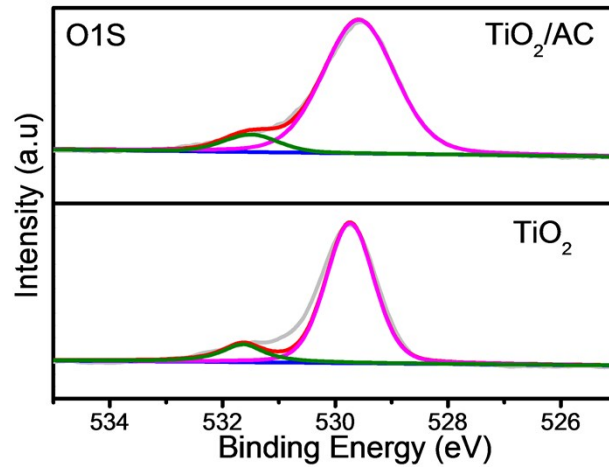

**Fig. S2.** The deconvoluted O1s XPS spectra of different TiO<sub>2</sub> films.

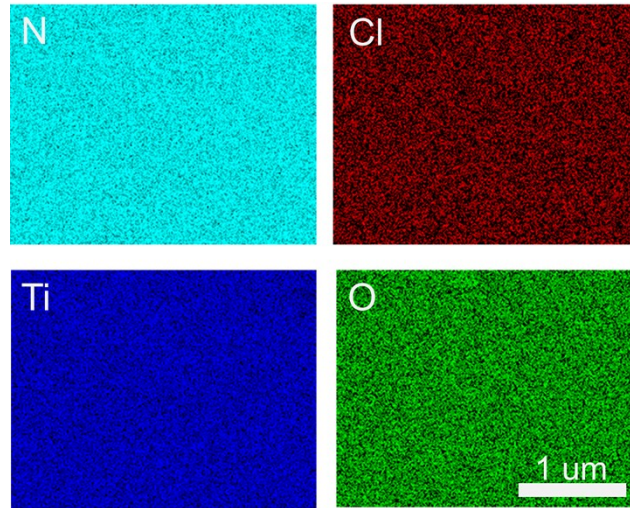

**Fig. S3.** EDS mapping images of N, Cl, Ti and O from *m*-TiO<sub>2</sub>/AC film.

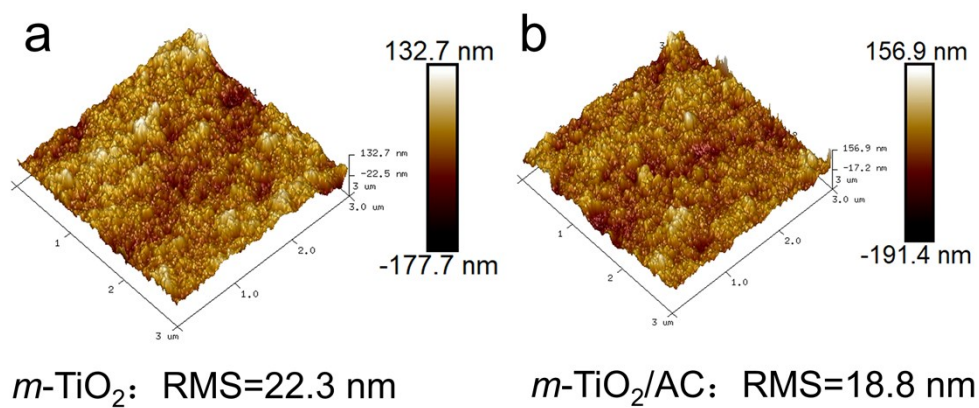

**Fig. S4.** AFM images of different  $m\text{-TiO}_2$  films.

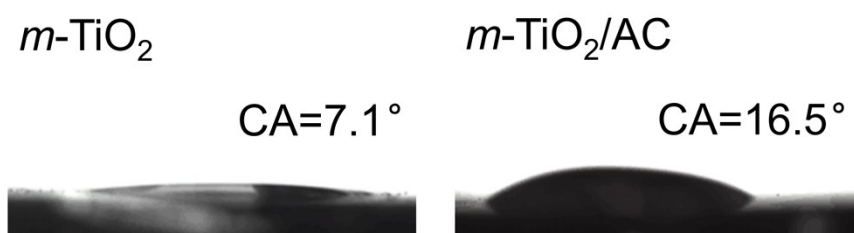

**Fig. S5.** The contact angle of DMF on the different *m*-TiO<sub>2</sub> films.

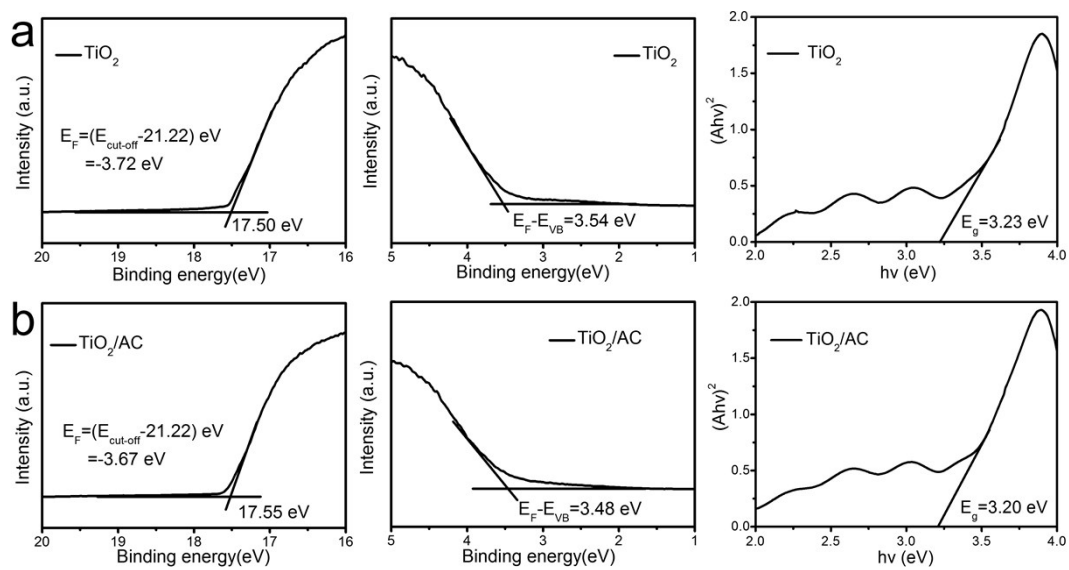

**Fig. S6.** Ultraviolet photoelectron spectra (UPS) and the Tauc plots for various TiO<sub>2</sub> films.

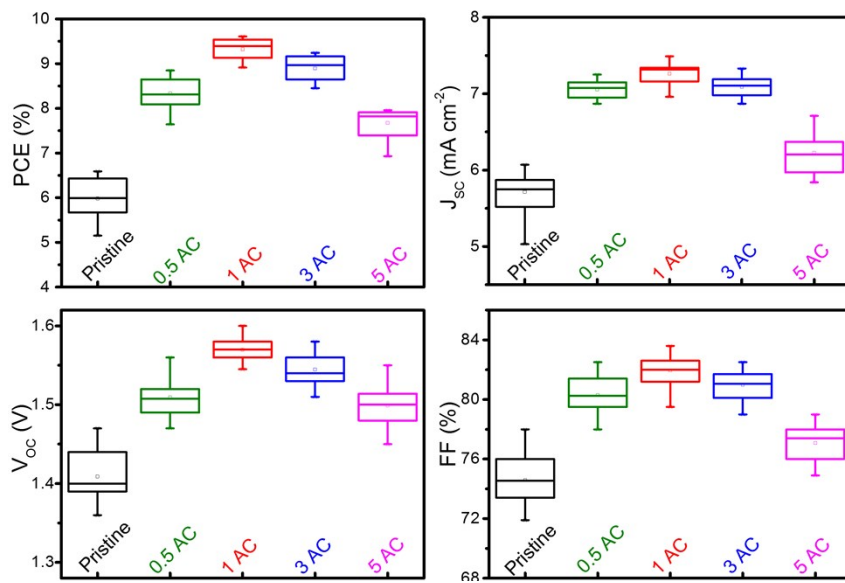

**Fig. S7.** Statistical distribution of PCE,  $J_{sc}$ ,  $V_{oc}$  and FF for thirty random control and AC modified devices.



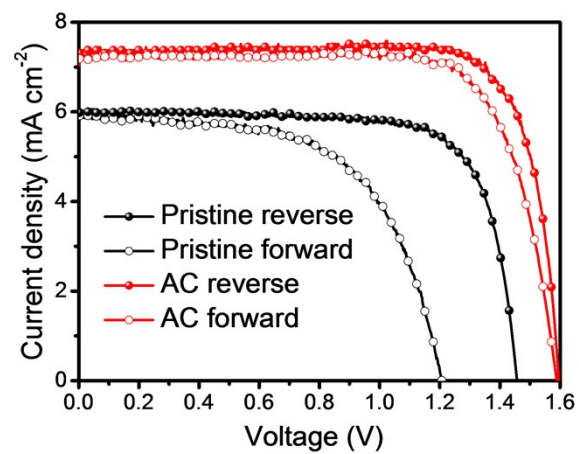

**Fig. S8.** Hysteresis analysis of control and AC modified CsPbBr<sub>3</sub> PSCs.

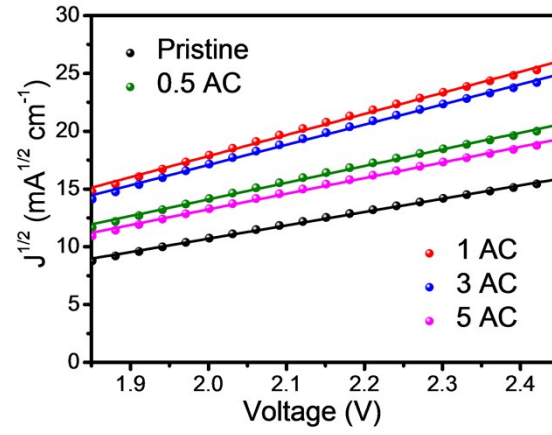

**Fig. S9.** The  $J^{1/2}$ - $V$  curves of the electron-only devices with a structure of FTO/TiO<sub>2</sub>/without or with AC/CsPbBr<sub>3</sub>/PCBM/Carbon.

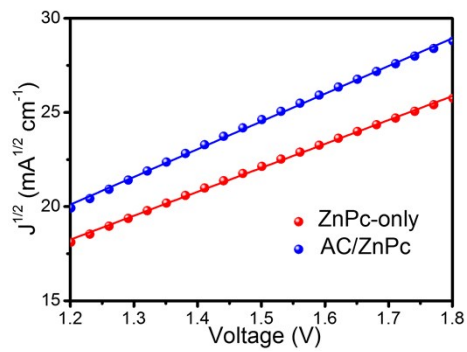

**Fig. S10.** The  $J^{1/2}$ - $V$  curves of various hole-only devices.

**Table S1.** The FWHM of the main peaks of different PbBr<sub>2</sub> films in XRD.

| Planes               | (011) | (101) | (111) | (013) | (004) | (201) |
|----------------------|-------|-------|-------|-------|-------|-------|
| PbBr <sub>2</sub>    | 0.056 | 0.089 | 0.125 | 0.073 | 0.027 | 0.136 |
| AC/PbBr <sub>2</sub> | 0.073 | 0.112 | 0.143 | 0.082 | 0.039 | 0.153 |

**Table S2.** The  $V_{\text{TFL}}$ ,  $N_{\text{t}}$ ,  $J_{\text{D}}$  and  $\mu_{\text{e}}$  value of various samples.

| samples  | $V_{\text{TFL}}$ (V) | $N_{\text{t}}$ ( $10^{16} \text{ cm}^{-3}$ ) | $J_{\text{D}}$ ( $10^{15} \text{ cm}^{-2}$ ) | $\mu_{\text{e}}$ ( $10^{-5} \text{ cm}^2 \text{ V}^{-1}\text{s}^{-1}$ ) |
|----------|----------------------|----------------------------------------------|----------------------------------------------|-------------------------------------------------------------------------|
| Pristine | 1.175                | 1.411                                        | 1.32                                         | 4.06                                                                    |
| 0.5 AC   | 1.136                | 1.364                                        | 2.57                                         | 8.11                                                                    |
| 1 AC     | 1.094                | 1.314                                        | 6.92                                         | 23.20                                                                   |
| 3 AC     | 1.125                | 1.352                                        | 5.22                                         | 16.80                                                                   |
| 5 AC     | 1.162                | 1.396                                        | 1.71                                         | 5.32                                                                    |

**Table S3.** The carrier lifetimes obtained from TRPL spectra of various CsPbBr<sub>3</sub> samples.

| Samples  | $\tau_{\text{ave}}$ (ns) | $\tau_1$ (ns) | $A_1$ (%) | $\tau_2$ (ns) | $A_2$ (%) |
|----------|--------------------------|---------------|-----------|---------------|-----------|
| Pristine | 0.51                     | 0.34          | 62.14     | 2.51          | 37.86     |
| 0.5 AC   | 0.25                     | 0.15          | 54.33     | 1.70          | 45.67     |
| 1 AC     | 0.18                     | 0.13          | 67.78     | 1.15          | 32.22     |
| 3 AC     | 0.20                     | 0.14          | 67.02     | 1.59          | 32.68     |
| 5 AC     | 0.28                     | 0.17          | 56.97     | 1.76          | 43.03     |

**Table S4.** The carrier lifetimes obtained from TRPL spectra of various CsPbBr<sub>3</sub> samples.

| Samples   | $\tau_{\text{ave}}$ (ns) | $\tau_1$ (ns) | $A_1$ (%) | $\tau_2$ (ns) | $A_2$ (%) |
|-----------|--------------------------|---------------|-----------|---------------|-----------|
| ZnPc-only | 0.20                     | 0.14          | 69.96     | 1.27          | 30.04     |
| AC/ZnPc   | 0.12                     | 0.09          | 70.32     | 0.76          | 29.68     |
